# Supplementary material
Source: Springer Nature journal article supplement (https://www.springermedizin.de/resource/supplementary/12885_2014_5105_MOESM4_ESM.pdf/9468460)

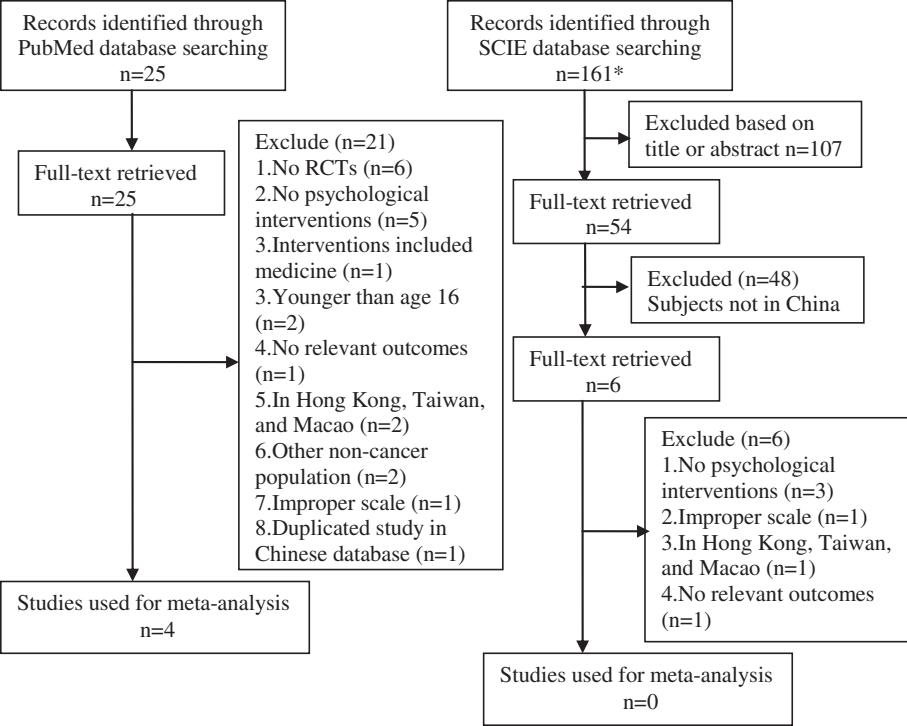

Supplement: MOESM4 [file 9468460]
